# Supplementary material for: Effectiveness of a Multi-Strategy Behavioral Intervention to Increase Vegetable Sales in Primary School Canteens: A Randomized Controlled Trial
Source: MDPI journal article supplement (doi:10.3390/nu14194218), 2022-10-10
Supplement: s1 [file s1]

## Supplementary Materials

**Table S1.** Questionnaire statements that canteen managers responded to measuring their level of agreement with individual and environmental factors affecting multi-strategy intervention implementation.

| Factor                               | Questionnaire statements <sup>1</sup>                                                                                |
|--------------------------------------|----------------------------------------------------------------------------------------------------------------------|
| <i>Individual factors</i>            |                                                                                                                      |
| Role clarity and knowledge (3)       | 1. For me it was clear what activities I had to do to increase the vegetable offering in the canteen.                |
|                                      | 2. I had all the information I needed to increase the vegetable offering in the canteen.                             |
|                                      | 3. I had enough knowledge to implement the information I received to increase the vegetable offering in the canteen. |
| Self-efficacy (3)                    | 4. I found it easy to do my tasks regarding the implementation of the VegUP canteen study.                           |
|                                      | 5. Other tasks were limiting my ability to perform my tasks for the VegUP canteen study.                             |
|                                      | 6. I was confident that I could increase the vegetable offering in the canteen in various ways.                      |
| Attitude-beliefs (3)                 | 7. I found it pleasant to do my tasks regarding the implementation of the VegUP canteen study.                       |
|                                      | 8. I felt good, when I performed tasks regarding the VegUP canteen study.                                            |
|                                      | 9. I believe it is possible to increase the vegetable offering in canteens with foods that students like.            |
| Attitude-Outcome expectations (4)    | 10. The effects of the VegUP canteen study are visible for me.                                                       |
|                                      | 11. The VegUP canteen study led to a healthier offer in the canteen.                                                 |
|                                      | 12. The VegUP canteen study will lead to students eating more vegetables.                                            |
| Routine (2)                          | 13. Performing my tasks for the VegUP canteen study gave me satisfaction.                                            |
|                                      | 14. For me it was easy to remember what I had to do to increase the vegetable offering in the canteen.               |
|                                      | 15. I checked regularly whether I performed all my tasks for the VegUP canteen study.                                |
| Motivation (1)                       | 16. I am motivated to increase the vegetable offering in the canteen.                                                |
| Skills (1)                           | 17. My skills are sufficient to increase the vegetable offering in the canteen.                                      |
| Professional Role (1)                | 18. In my opinion, it is my task to increase the vegetable offering in the canteen.                                  |
| <i>Environmental factors</i>         |                                                                                                                      |
| Need for support (3)                 | 19. I needed more information to perform my tasks regarding the VegUP canteen study.                                 |
|                                      | 20. I needed more training to perform my tasks regarding the VegUP canteen study.                                    |
|                                      | 21. I needed more support to perform my tasks regarding the VegUP canteen study.                                     |
| Innovation (2)                       | 22. The recommended strategies can be adapted to the food policy vision of my school.                                |
|                                      | 23. The recommended strategies benefit students of all backgrounds.                                                  |
| Perceived organizational support (4) | 24. I had enough time to increase the vegetable offering in the canteen.                                             |
|                                      | 25. In my canteen, we have enough human resources to increase the vegetable offering.                                |
|                                      | 26. In my canteen, we have enough space and equipment to increase the vegetable offering.                            |
|                                      | 27. In my canteen, we had sufficient financial resources to increase the vegetable offering in the canteen.          |

<sup>1</sup> Rated using a five-point scale, from 1 = strongly disagree, to 5 = strongly agree.

**Table S2.** Individual and environmental factors affecting multi-strategy intervention implementation as perceived by the canteen managers (n = 8), shown as means and standard deviations (SD).

| Factor                                                                                       | Factor mean (SD) <sup>1</sup> |
|----------------------------------------------------------------------------------------------|-------------------------------|
| <i>Individual factors</i>                                                                    |                               |
| Role clarity and knowledge (3 items, $\alpha = 0.945$ ) <sup>2</sup>                         | 4.5 (0.5)                     |
| Self-efficacy (3 items, $\alpha = 0.447$ )                                                   |                               |
| I found it easy to do my tasks regarding the implementation of the VegUP canteen study.      | 4.4 (0.5)                     |
| Other tasks were limiting my ability to perform my tasks for the VegUP canteen study.        | 2.1 (1.2)                     |
| I was confident that I could increase the vegetable offering in the canteen in various ways. | 3.8 (0.9)                     |
| Attitude (7 items, $\alpha = 0.935$ )                                                        | 3.6 (0.7)                     |
| Routine (2 items, $\alpha = 0.949$ )                                                         | 4.1 (1.0)                     |
| Motivation (1 item)                                                                          | 4.0 (0.8)                     |
| Skills (1 item)                                                                              | 4.0 (0.5)                     |
| Professional role (1 item)                                                                   | 3.6 (0.9)                     |
| <i>Environmental factors</i>                                                                 |                               |
| Need for support (3 items, $\alpha = 1.000$ )                                                | 2.0 (0.8)                     |
| Innovation (2 items, $\alpha = 0.544$ )                                                      |                               |
| The recommended strategies can be adapted to the food policy vision of my school.            | 3.4 (0.9)                     |
| The recommended strategies benefit students of all backgrounds.                              | 3.8 (0.7)                     |
| Perceived organizational support (4 items, $\alpha = 0.950$ )                                | 4.0 (0.7)                     |

<sup>1</sup> Measured with a five-point scale, from 1 = strongly disagree, to 5 = strongly agree. <sup>2</sup> Number of questions on which the factor was based and Cronbach's alpha. When Cronbach Alpha was >0.7 the ratings for these items were averaged per respondent for analysis, otherwise individual item questions were retained.

**Table S3.** Canteen manager evaluation (n=8) of seven specific intervention strategies on five acceptability factors<sup>1</sup>, shown as means and standard deviations (SD).

| Intervention strategy                                       | Easy to implement | Children responded positive | Time / labour intensive | Wasteful  | Sustainable in future |
|-------------------------------------------------------------|-------------------|-----------------------------|-------------------------|-----------|-----------------------|
| Selling Rainbow Dippers                                     | 4.1 (0.6)         | 1.5 (0.8)                   | 2.4 (1.5)               | 3.8 (1.3) | 1.1 (0.4)             |
| Vegetable-containing items positioned higher in online menu | 4.6 (0.8)         | 2.7 (1.5)                   | 2.1 (1.7)               | 2.7 (1.7) | 2.9 (1.3)             |
| Increased vegetable content in existing hot meals           | 4.6 (0.5)         | 3.5 (1.5)                   | 1.9 (1.1)               | 1.8 (1.2) | 3.4 (1.6)             |
| Default lettuce/cucumber in sandwiches                      | 4.5 (0.8)         | 2.6 (1.4)                   | 2.0 (1.2)               | 2.3 (1.3) | 3.0 (1.6)             |
| Default beetroot in burgers                                 | 4.4 (0.9)         | 1.8 (0.9)                   | 1.6 (1.2)               | 2.0 (1.4) | 2.6 (1.6)             |
| Pizza muffin with tomato slice                              | 4.5 (0.8)         | 3.6 (1.2)                   | 1.5 (1.1)               | 2.1 (1.4) | 3.1 (1.7)             |
| Replaced fruit with vegetables in Bento Box                 | 4.8 (0.5)         | 3.8 (1.4)                   | 1.5 (1.1)               | 2.0 (0.9) | 3.1 (1.5)             |

<sup>1</sup> Measured with a five-point scale, from 1 = strongly disagree, to 5 = strongly agree.
